# Supplementary material for: Endogenous Circulating Sex Hormone Concentrations and Colon Cancer Risk in Postmenopausal Women: A Prospective Study and Meta-Analysis
Source: PubMed Central journal article supplement — JNCI Cancer Spectr. 2021 Sep 28;5(6):pkab084. doi: 10.1093/jncics/pkab084 (PMC8598284; doi:10.1093/jncics/pkab084), 2021-09-28
Supplement: pkab084_supplementary_data.pdf [file pkab084_supplementary_data.pdf]

## **SUPPLEMENTARY MATERIAL**

### **Supplementary Methods**

#### **Laboratory methods and assessment of sex hormone concentrations and SHBG**

Plasma sex hormones and SHBG concentrations were measured at IARC (Lyon, France) using a validated analytical method adapted from previous publications (1, 2). Briefly for the sex hormones, 280  $\mu$ L of plasma (to which 20  $\mu$ L of a mixture of deuterated internal standards are added), were extracted with methyl tert-butyl ether, evaporated to dryness and reconstituted with a solution of 40% (v/v) methanol/water. Solutions were then injected into the liquid chromatography-mass spectrometry (LC-MS) system consisting of ultra-high performance LC (Agilent 1290, Agilent, Santa Clara, CA) and a QTRAP 5500 MS (SCIEX, Framingham, MA). Chromatographic conditions were as follows: a reversed phase C18 column (Waters Acquity UPLC CSH C18 1.7 $\mu$ m 2.1\*100mm) at 50 °C with an 8-minute linear methanol/water gradient from 55% to 65% methanol and a flow rate of 0.4 mL/min. The general MS conditions were: APCI source in positive polarity for androstenedione, DHEA, testosterone, and progesterone, and negative polarity for estrone, and estradiol. Stable isotope labeled analogues of each analyte were used as internal standards and two MS/MS transitions were monitored for each compound, one for quantification and another to monitor specificity. Quantification was based on individual internal standards. Solid phase “sandwich” enzyme-linked immunoassay (DRG) was used for the measurement of SHBG concentrations. Lower limits of quantification (LLOQ) for each sex hormone was 7.5 pg/mL for androstenedione, 125 pg/mL for DHEA, 1.25 pg/mL for estradiol, and 1.25 pg/mL for estrone, 7.5 pg/mL for progesterone, 7.5 pg/mL for testosterone, and 4 nmol/l for SHBG. Three quality control samples at different concentration levels were measured in duplicate in each batch of analyses. Intra-batch coefficients of variation of sex hormone and SHBG concentrations ranged from 1.4 % and 8 %. Inter-batch coefficients of variations were <10 % for all analytes.

Plasma concentration of free estradiol was calculated using a validated algorithm (3) taking into consideration measured estradiol and SHBG concentrations, and an assumed constant for albumin. Free testosterone was also computed from previously validated mass action equation using absolute concentrations of testosterone and an assumed albumin constant of 43 g/L (4, 5). We also calculated the estradiol to testosterone ratio (by dividing the estradiol concentration by testosterone concentration) as a higher ratio indicates greater production of estradiol from aromatase conversion.

### **Meta-analysis**

We performed a hand search up to July 2020 on PubMed using the keywords (“colorectal” OR “colorectum” OR “colon” OR “rectum”) and “cancer” and "sex hormone". We limited our search to studies published in English that prospectively evaluated the association between circulating estradiol and estrone with colorectal, colon, or rectal cancer risk.

The following information was extracted from each identified study: the first author’s last name, publication year, study design, country of origin, number of cases/controls, outcome measures, exposure level, relative risks (RRs) and 95% confidence intervals (CIs), and adjusted confounders from each study. Characteristics of the included studies are described in **Supplementary Table 5**.

We calculated summary RRs and 95% CIs for a 5 pg/ml increment in estradiol, and 10 pg/ml increment in estrone using a random effects model. In the primary analysis, we used the multivariable model from each study, which included greatest number of covariates. The average of the natural logarithm of the RRs was estimated and RR of each study was weighted using random effects weighting.

The dose-response analysis described by Greenland and Longnecker (6) was used to compute specific slopes (linear trends) and 95% CIs from the natural logs of the reported RRs and CIs across categories of estradiol and estrone concentrations. We contacted authors of two studies (7, 8) for additional data to be included in the dose-response analysis.

Heterogeneity in results across studies was also examined using Cochran  $Q$  and  $I^2$  statistics.

Statistical analyses were performed with Stata (version 15.1; StataCorp, College Station, TX).

## References

1. Franke AA, Custer LJ, Morimoto Y, Nordt FJ, Maskarinec G. Analysis of urinary estrogens, their oxidized metabolites, and other endogenous steroids by benchtop orbitrap LCMS versus traditional quadrupole GCMS. *Anal Bioanal Chem.* 2011;401(4):1319-30.
2. Keski-Rahkonen P, Desai R, Jimenez M, Harwood DT, Handelsman DJ. Measurement of Estradiol in Human Serum by LC-MS/MS Using a Novel Estrogen-Specific Derivatization Reagent. *Anal Chem.* 2015;87(14):7180-6.
3. Södergård R, Bäckström T, Shanbhag V, Carstensen H. Calculation of free and bound fractions of testosterone and estradiol-17 beta to human plasma proteins at body temperature. *J Steroid Biochem.* 1982;16(6):801-10.
4. Vermeulen A, Verdonck L, Kaufman JM. A critical evaluation of simple methods for the estimation of free testosterone in serum. *J Clin Endocrinol Metab.* 1999;84(10):3666-72.
5. Rinaldi S, Geay A, Dechaud H, Biessy C, Zeleniuch-Jacquotte A, Akhmedkhanov A, et al. Validity of free testosterone and free estradiol determinations in serum samples from postmenopausal women by theoretical calculations. *Cancer Epidemiol Biomarkers Prev.* 2002;11(10 Pt 1):1065-71.
6. Benjamini Y, Hochberg Y. Controlling the False Discovery Rate: A Practical and Powerful Approach to Multiple Testing. *J R Stat Soc Ser B: Methodol.* 1995(57):289–300.
7. Clendenen TV, Koenig KL, Shore RE, Levitz M, Arslan AA, Zeleniuch-Jacquotte A. Postmenopausal levels of endogenous sex hormones and risk of colorectal cancer. *Cancer Epidemiol Biomarkers Prev.* 2009;18(1):275-81.

8. Falk RT, Dallal CM, Lacey JV, Jr., Bauer DC, Buist DS, Cauley JA, et al. Estrogen Metabolites Are Not Associated with Colorectal Cancer Risk in Postmenopausal Women. *Cancer Epidemiol Biomarkers Prev.* 2015;24(9):1419-22.
9. Lin JH, Zhang SM, Rexrode KM, Manson JE, Chan AT, Wu K, et al. Association between sex hormones and colorectal cancer risk in men and women. *Clin Gastroenterol Hepatol.* 2013;11(4):419-24.e1.
10. Gunter MJ, Hoover DR, Yu H, Wassertheil-Smoller S, Rohan TE, Manson JE, et al. Insulin, insulin-like growth factor-I, endogenous estradiol, and risk of colorectal cancer in postmenopausal women. *Cancer Res.* 2008;68(1):329-37.
11. Murphy N, Strickler HD, Stanczyk FZ, Xue X, Wassertheil-Smoller S, Rohan TE, et al. A Prospective Evaluation of Endogenous Sex Hormone Levels and Colorectal Cancer Risk in Postmenopausal Women. *J Natl Cancer Inst.* 2015;107(10).
12. Mori N, Sawada N, Iwasaki M, Yamaji T, Goto A, Shimazu T, et al. Circulating sex hormone levels and colorectal cancer risk in Japanese postmenopausal women: The JPHC nested case-control study. *Int J Cancer.* 2019;145(5):1238-44.

## Supplementary Tables

Supplementary Table 1. Baseline characteristics of colon cancer cases and controls.

| Variables                                 | Cases<br>(n = 512)  | Controls<br>(n = 516) | <i>P</i> <sup>a</sup> |
|-------------------------------------------|---------------------|-----------------------|-----------------------|
| Mean age at blood collection (SD), y      | 62.0 (5.3)          | 61.9 (5.3)            | 0.66 <sup>a</sup>     |
| Mean weight (SD), kg                      | 69.0 (11.9)         | 67.6 (10.6)           | 0.18 <sup>a</sup>     |
| Body mass index, No. (%)                  | 26.7 (4.7)          | 26.5 (4.2)            | 0.79 <sup>b</sup>     |
| Underweight (>18.5 kg/m <sup>2</sup> )    | 5 (1.0)             | 6 (1.2)               | 0.95                  |
| Normal (18.5-24.9 kg/m <sup>2</sup> )     | 204 (39.8)          | 202 (39.2)            |                       |
| Overweight (25.0-29.9 kg/m <sup>2</sup> ) | 201 (39.3)          | 210 (40.7)            |                       |
| Obese (≥30 kg/m <sup>2</sup> )            | 102 (19.9)          | 98 (19.0)             |                       |
| Smoking status, No. (%)                   |                     |                       | 0.73 <sup>b</sup>     |
| Never                                     | 309 (60.4)          | 323 (62.6)            |                       |
| Former                                    | 123 (24.0)          | 111 (21.5)            |                       |
| Current                                   | 72 (14.1)           | 76 (14.7)             |                       |
| Unknown                                   | 8 (1.6)             | 6 (1.2)               |                       |
| Physical activity, No. (%)                |                     |                       | 0.99 <sup>b</sup>     |
| Inactive                                  | 173 (33.8)          | 181 (35.1)            |                       |
| Moderately inactive                       | 157 (30.7)          | 156 (30.2)            |                       |
| Moderately active                         | 93 (18.2)           | 92 (17.8)             |                       |
| Active                                    | 73 (14.3)           | 73 (14.2)             |                       |
| Missing                                   | 16 (3.1)            | 14 (2.7)              |                       |
| Ever menopausal hormone use, No. (%)      |                     |                       | 0.90 <sup>b</sup>     |
| No                                        | 413 (80.7)          | 418 (81.0)            |                       |
| Yes                                       | 70 (13.7)           | 72 (14.0)             |                       |
| Unknown/missing                           | 29 (5.7)            | 26 (5.0)              |                       |
| Mean alcohol consumption (SD), g/day      | 5.6 (9.6)           | 5.7 (10.0)            | 0.80 <sup>a</sup>     |
| Serologic variables, median (IQR)         |                     |                       |                       |
| Estrone, pg/mL                            | 18.3 (13.0-25.8)    | 18.1 (13.1-24.0)      | 0.27 <sup>a</sup>     |
| Estradiol, pg/mL                          | 4.0 (2.6-6.2)       | 4.1 (2.6-6.1)         | 0.92 <sup>a</sup>     |
| Testosterone, pg/mL                       | 187.3 (132.0-259.3) | 185.0 (129.6-250.0)   | 0.52 <sup>a</sup>     |
| Androstenedione, ng/mL                    | 493.5 (350.0-681.3) | 478.2 (353.9-646.4)   | 0.54 <sup>a</sup>     |
| DHEA, ng/mL                               | 1.9 (1.2-2.8)       | 1.8 (1.2-2.9)         | 0.99 <sup>a</sup>     |
| Progesterone, pg/mL                       | 52.7 (37.8-77.3)    | 53.8 (39.7-73.6)      | 0.79 <sup>a</sup>     |
| SHBG, nmol/L                              | 54.2 (38.4-73.6)    | 53.6 (41.0-70.7)      | 0.92 <sup>a</sup>     |
| Free estradiol, pg/mL                     | 88.3 (55.9-157.9)   | 94.9 (57.8-142.7)     | 0.91 <sup>a</sup>     |
| Free testosterone, ng/mL                  | 5.2 (3.3-7.9)       | 5.2 (3.3-7.4)         | 0.55 <sup>a</sup>     |

<sup>a</sup> *P* value was calculated using a 2-sided Wilcoxon two-sample test. SD = standard deviation; IQR = interquartile range; DEHA = dehydroepiandrosterone; SHBG = sex hormone binding protein.

<sup>b</sup> *P* value was calculated using a 2-sided  $\chi^2$  test.

Supplementary Table 2. Associations between circulating concentrations of sex hormones with colon cancer in postmenopausal women (n=1028) after imputing the concentration with <LLOQ values by multiple imputation.

| Variables                                       | Quartile 1    | Quartile 2        | Quartile 3        | Quartile 4        | <i>P</i> <sub>trend</sub> <sup>a</sup> | Continuous model <sup>b</sup> |
|-------------------------------------------------|---------------|-------------------|-------------------|-------------------|----------------------------------------|-------------------------------|
| Estradiol                                       |               |                   |                   |                   |                                        |                               |
| Quartile cutpoints                              | <2.8          | 2.8-4.2           | 4.2-6.2           | ≥6.2              |                                        |                               |
| No. (cases/controls)                            | 132/135       | 124/127           | 118/127           | 138/127           |                                        |                               |
| Multivariable-adjusted OR (95% CI) <sup>c</sup> | 1 (reference) | 1.01 (0.71, 1.44) | 0.99 (0.68, 1.44) | 1.19 (0.81, 1.76) | 0.43                                   | 1.11 (0.97, 1.27)             |
| DHEA                                            |               |                   |                   |                   |                                        |                               |
| Quartile cutpoints                              | <1.2          | 1.2-1.8           | 1.8-2.9           | ≥2.9              |                                        |                               |
| No. (cases/controls)                            | 134/129       | 112/129           | 149/129           | 117/129           |                                        |                               |
| Multivariable-adjusted OR (95% CI) <sup>c</sup> | 1 (reference) | 0.82 (0.58, 1.17) | 1.12 (0.79, 1.59) | 0.85 (0.58, 1.23) | 0.78                                   | 0.98 (0.85, 1.12)             |
| Free estradiol                                  |               |                   |                   |                   |                                        |                               |
| Quartile cutpoints                              | <61.0         | 61.0-97.7         | 97.7-148.4        | ≥148.4            |                                        |                               |
| No. (cases/controls)                            | 137/134       | 126/128           | 101/127           | 148/127           |                                        |                               |
| Multivariable-adjusted OR (95% CI) <sup>c</sup> | 1 (reference) | 0.95 (0.68, 1.34) | 0.79 (0.54, 1.15) | 1.18 (0.80, 1.73) | 0.56                                   | 1.09 (0.96, 1.24)             |
| Estradiol to testosterone ratio                 |               |                   |                   |                   |                                        |                               |
| Quartile cutpoints                              | <0.20         | 0.20-0.28         | 0.28-0.34         | ≥0.34             |                                        |                               |
| No. (cases/controls)                            | 125/135       | 145/127           | 99/126            | 143/128           |                                        |                               |
| Multivariable-adjusted OR (95% CI) <sup>c</sup> | 1 (reference) | 1.20 (0.85, 1.68) | 0.85 (0.58, 1.25) | 1.22 (0.82, 1.80) | 0.62                                   | 2.10 (0.76, 5.79)             |

<sup>a</sup> Statistical tests for trend (two-sided) were calculated using ordinal quartile variables entered into the model as a single continuous variable. CI = confidence intervals; DHEA = dehydroepiandrosterone; OR = odds ratio.

<sup>b</sup> Serologic variables were log<sub>2</sub>-transformed in continuous models

<sup>c</sup> ORs and 95% CIs were estimated by conditional logistic regression model. Adjusted for body mass index (underweight, normal, overweight, or obese), smoking status (never, former, current or unknown), physical activity (inactive, moderately inactive, moderately active, active, or unknown), ever hormone use (yes, no, or unknown/missing), alcohol consumption (continuous), and estrone, estradiol and testosterone were adjusted for SHBG and vice versa.

Supplementary Table 3. Association between circulating concentrations of sex hormones and SHBG with colon cancer in postmenopausal women after excluding participants who were diagnosed with colon cancer in the first 2 years of follow-up (n=1009)

| Variables                                       | Quartile 1    | Quartile 2        | Quartile 3        | Quartile 4        | $P_{\text{trend}}^a$ | Continuous model <sup>b</sup> |
|-------------------------------------------------|---------------|-------------------|-------------------|-------------------|----------------------|-------------------------------|
| <b>Estrone</b>                                  |               |                   |                   |                   |                      |                               |
| Quartile cutpoints                              | <13.1         | 13.1-18.1         | 18.1-24.0         | $\geq 24.0$       |                      |                               |
| No. (cases/controls)                            | 122/129       | 114/129           | 106/129           | 151/129           |                      |                               |
| Multivariable-adjusted OR (95% CI) <sup>c</sup> | 1 (reference) | 0.90 (0.62, 1.32) | 0.88 (0.60, 1.30) | 1.32 (0.88, 1.97) | 0.22                 | 1.16 (0.98, 1.36)             |
| <b>Estradiol</b>                                |               |                   |                   |                   |                      |                               |
| Quartile cutpoints                              | <2.6          | 2.6-4.1           | 4.1-6.1           | $\geq 6.1$        |                      |                               |
| No. (cases/controls)                            | 121/129       | 128/129           | 113/129           | 131/129           |                      |                               |
| Multivariable-adjusted OR (95% CI) <sup>c</sup> | 1             | 1.04 (0.73, 1.51) | 0.92 (0.63, 1.36) | 1.10 (0.73, 1.65) | 0.78                 | 1.04 (0.92, 1.18)             |
| <b>Testosterone</b>                             |               |                   |                   |                   |                      |                               |
| Quartile cutpoints                              | <129.3        | 129.3-184.5       | 184.5-249.9       | $\geq 249.9$      |                      |                               |
| No. (cases/controls)                            | 121/129       | 115/129           | 114/129           | 143/129           |                      |                               |
| Multivariable-adjusted OR (95% CI) <sup>c</sup> | 1 (reference) | 0.93 (0.65, 1.34) | 0.91 (0.62, 1.32) | 1.11 (0.77, 1.62) | 0.58                 | 1.00 (0.83, 1.19)             |
| <b>Androstenedione</b>                          |               |                   |                   |                   |                      |                               |
| Quartile cutpoints                              | <353.8        | 353.8-477.7       | 477.7-645.5       | $\geq 645.5$      |                      |                               |
| No. (cases/controls)                            | 129/129       | 103/129           | 117/129           | 144/129           |                      |                               |
| Multivariable-adjusted OR (95% CI) <sup>c</sup> | 1 (reference) | 0.80 (0.55, 1.17) | 0.90 (0.63, 1.30) | 1.08 (0.74, 1.58) | 0.58                 | 1.00 (0.82, 1.22)             |
| <b>DHEA</b>                                     |               |                   |                   |                   |                      |                               |
| Quartile cutpoints                              | <1.2          | 1.2-1.8           | 1.8-2.9           | $\geq 2.9$        |                      |                               |
| No. (cases/controls)                            | 129/129       | 106/129           | 145/129           | 113/129           |                      |                               |
| Multivariable-adjusted OR (95% CI) <sup>c</sup> | 1 (reference) | 0.80 (0.56, 1.14) | 1.07 (0.75, 1.53) | 0.81 (0.55, 1.18) | 0.60                 | 0.97 (0.84, 1.11)             |
| <b>Progesterone</b>                             |               |                   |                   |                   |                      |                               |
| Quartile cutpoints                              | <39.6         | 39.6-53.6         | 53.6-73.6         | $\geq 73.6$       |                      |                               |
| No. (cases/controls)                            | 135/129       | 115/128           | 105/130           | 138/129           |                      |                               |
| Multivariable-adjusted OR (95% CI) <sup>c</sup> | 1 (reference) | 0.85 (0.59, 1.22) | 0.78 (0.53, 1.12) | 0.99 (0.68, 1.42) | 0.85                 | 0.94 (0.79, 1.12)             |
| <b>SHBG</b>                                     |               |                   |                   |                   |                      |                               |
| Quartile cutpoints                              | <40.8         | 40.8-53.5         | 53.5-70.7         | $\geq 70.7$       |                      |                               |
| No. (cases/controls)                            | 143/128       | 102/130           | 180/129           | 140/129           |                      |                               |
| Multivariable-adjusted OR (95% CI) <sup>c</sup> | 1 (reference) | 0.74 (0.51, 1.08) | 0.74 (0.51, 1.08) | 1.00 (0.69, 1.46) | 1.00                 | 0.99 (0.81, 1.20)             |

|                                                 |               |                   |                   |                   |      |                   |
|-------------------------------------------------|---------------|-------------------|-------------------|-------------------|------|-------------------|
| Free estradiol                                  |               |                   |                   |                   |      |                   |
| Quartile cutpoints                              | <57.7         | 57.7-94.7         | 94.7-142.3        | ≥142.3            |      |                   |
| No. (cases/controls)                            | 128/129       | 132/129           | 90/129            | 143/129           |      |                   |
| Multivariable-adjusted OR (95% CI) <sup>c</sup> | 1 (reference) | 0.98 (0.69, 1.40) | 0.67 (0.44, 1.00) | 1.08 (0.72, 1.61) | 1.00 | 1.03 (0.91, 1.15) |
| Free testosterone                               |               |                   |                   |                   |      |                   |
| Quartile cutpoints                              | <3.3          | 3.3-5.2           | 5.2-7.4           | ≥7.4              |      |                   |
| No. (cases/controls)                            | 121/129       | 117/129           | 104/129           | 151/129           |      |                   |
| Multivariable-adjusted OR (95% CI) <sup>c</sup> | 1 (reference) | 0.97 (0.68, 1.39) | 0.84 (0.58, 1.22) | 1.23 (0.85, 1.78) | 0.37 | 1.03 (0.91, 1.15) |
| Estradiol to testosterone ratio                 |               |                   |                   |                   |      |                   |
| Quartile cutpoints                              | <0.19         | 0.19-0.27         | 0.27-0.33         | ≥0.33             |      |                   |
| No. (cases/controls)                            | 116/129       | 142/129           | 103/129           | 132/129           |      |                   |
| Multivariable-adjusted OR (95% CI) <sup>c</sup> | 1 (reference) | 1.19 (0.84, 1.69) | 0.86 (0.58, 1.28) | 1.10 (0.73, 1.66) | 0.95 | 1.24 (0.48, 3.18) |

<sup>a</sup> Statistical tests for trend (two-sided) were calculated using ordinal quartile variables entered into the model as a single continuous variable. CI = confidence intervals; DHEA = dehydroepiandrosterone; OR = odds ratio; SHBG = sex hormone-binding globulin.

<sup>b</sup> Serologic variables were log<sub>2</sub>-transformed in continuous models.

<sup>c</sup> ORs and 95% CIs were estimated by conditional logistic regression model. Adjusted for body mass index (underweight, normal, overweight, or obese), smoking status (never, former, current or unknown), physical activity (inactive, moderately inactive, moderately active, active, or unknown), ever hormone use (yes, no, or unknown/missing), alcohol consumption (continuous), and estrone, estradiol and testosterone were adjusted for SHBG and vice versa.

Supplementary Table 4. Association between circulating concentrations of sex hormones, and SHBG with risks of proximal colon and distal colon cancer in postmenopausal women (n= 1028)

| Variables                                       | Tertile 1     | Tertile 2         | Tertile 3         | $P_{\text{trend}}^a$ | Continuous model <sup>b</sup> |
|-------------------------------------------------|---------------|-------------------|-------------------|----------------------|-------------------------------|
| Estrone                                         |               |                   |                   |                      |                               |
| Tertile cutpoints                               | <14.5         | 14.5-21.7         | $\geq 21.7$       |                      |                               |
| Proximal colon (n = 278)                        |               |                   |                   |                      |                               |
| Multivariable-adjusted OR (95% CI) <sup>c</sup> | 1 (reference) | 1.29 (0.83, 2.02) | 1.58 (0.98, 2.53) | 0.06                 | 1.22 (1.00, 1.48)             |
| Distal colon (n = 176)                          |               |                   |                   |                      |                               |
| Multivariable-adjusted OR (95% CI) <sup>c</sup> | 1 (reference) | 0.86 (0.50, 1.49) | 0.80 (0.43, 1.50) | 0.48                 | 1.00 (0.71, 1.41)             |
| Estradiol                                       |               |                   |                   |                      |                               |
| Tertile cutpoints                               | <3.0          | 3.0-5.2           | $\geq 5.2$        |                      |                               |
| Proximal colon (n = 278)                        |               |                   |                   |                      |                               |
| Multivariable-adjusted OR (95% CI) <sup>c</sup> | 1 (reference) | 1.30 (0.85, 2.00) | 1.20 (0.75, 1.93) | 0.45                 | 1.11 (0.95, 1.30)             |
| Distal colon (n = 176)                          |               |                   |                   |                      |                               |
| Multivariable-adjusted OR (95% CI) <sup>c</sup> | 1 (reference) | 0.74 (0.44, 1.24) | 0.74 (0.39, 1.41) | 0.33                 | 0.92 (0.73, 1.17)             |
| Testosterone                                    |               |                   |                   |                      |                               |
| Tertile cutpoints                               | <149.5        | 149.5-221.1       | $\geq 221.1$      |                      |                               |
| Proximal colon (n = 278)                        |               |                   |                   |                      |                               |
| Multivariable-adjusted OR (95% CI) <sup>c</sup> | 1 (reference) | 0.92 (0.61, 1.38) | 1.33 (0.87, 2.03) | 0.20                 | 1.08 (0.86, 1.36)             |
| Distal colon (n = 176)                          |               |                   |                   |                      |                               |
| Multivariable-adjusted OR (95% CI) <sup>c</sup> | 1 (reference) | 0.68 (0.38, 1.21) | 0.92 (0.51, 1.68) | 0.90                 | 0.97 (0.69, 1.37)             |
| Androstenedione                                 |               |                   |                   |                      |                               |
| Tertile cutpoints                               | <394.7        | 394.7-589.2       | $\geq 589.2$      |                      |                               |
| Proximal colon (n = 289)                        |               |                   |                   |                      |                               |
| Multivariable-adjusted OR (95% CI) <sup>c</sup> | 1 (reference) | 1.10 (0.73, 1.66) | 1.12 (0.74, 1.68) | 0.59                 | 1.05 (0.83, 1.34)             |
| Distal colon (n = 188)                          |               |                   |                   |                      |                               |
| Multivariable-adjusted OR (95% CI) <sup>c</sup> | 1 (reference) | 0.97 (0.55, 1.69) | 0.85 (0.48, 1.51) | 0.57                 | 0.85 (0.58, 1.25)             |
| DHEA                                            |               |                   |                   |                      |                               |
| Tertile cutpoints                               | <1414.3       | 1414.3-2482.3     | $\geq 2482.3$     |                      |                               |
| Proximal colon (n = 289)                        |               |                   |                   |                      |                               |

|                                                 |               |                   |                   |      |                   |
|-------------------------------------------------|---------------|-------------------|-------------------|------|-------------------|
| Multivariable-adjusted OR (95% CI) <sup>c</sup> | 1 (reference) | 0.93 (0.61, 1.40) | 1.07 (0.69, 1.66) | 0.79 | 1.01 (0.85, 1.21) |
| Distal colon (n = 188)                          |               |                   |                   |      |                   |
| Multivariable-adjusted OR (95% CI) <sup>c</sup> | 1 (reference) | 1.35 (0.75, 2.42) | 0.74 (0.42, 1.30) | 0.29 | 0.87 (0.68, 1.11) |
| Progesterone                                    |               |                   |                   |      |                   |
| Tertile cutpoints                               | <44.1         | 44.1-65.4         | ≥65.4             |      |                   |
| Proximal colon (n = 289)                        |               |                   |                   |      |                   |
| Multivariable-adjusted OR (95% CI) <sup>c</sup> | 1 (reference) | 1.24 (0.82, 1.86) | 1.17 (0.77, 1.80) | 0.46 | 0.99 (0.80, 1.23) |
| Distal colon (n = 188)                          |               |                   |                   |      |                   |
| Multivariable-adjusted OR (95% CI) <sup>c</sup> | 1 (reference) | 0.95 (0.52, 1.72) | 0.94 (0.53, 1.66) | 0.82 | 0.88 (0.64, 1.21) |
| SHBG                                            |               |                   |                   |      |                   |
| Tertile cutpoints                               |               |                   |                   |      |                   |
| Proximal colon (n = 289)                        | <46.0         | 46.0-63.7         | ≥63.7             |      |                   |
| Multivariable-adjusted OR (95% CI) <sup>c</sup> | 1 (reference) | 0.61 (0.40, 0.94) | 1.02 (0.65, 1.60) | 0.93 | 0.98 (0.75, 1.28) |
| Distal colon (n = 188)                          |               |                   |                   |      |                   |
| Multivariable-adjusted OR (95% CI) <sup>c</sup> | 1 (reference) | 0.67 (0.37, 1.20) | 0.82 (0.47, 1.44) | 0.57 | 0.97 (0.69, 1.37) |
| Free estradiol                                  |               |                   |                   |      |                   |
| Tertile cutpoints                               | <69.5         | 69.5-123.4        | ≥123.4            |      |                   |
| Proximal colon (n = 289)                        |               |                   |                   |      |                   |
| Multivariable-adjusted OR (95% CI) <sup>c</sup> | 1 (reference) | 0.98 (0.64, 1.48) | 1.08 (0.67, 1.73) | 0.75 | 1.08 (0.93, 1.25) |
| Distal colon (n = 188)                          |               |                   |                   |      |                   |
| Multivariable-adjusted OR (95% CI) <sup>c</sup> | 1 (reference) | 0.53 (0.31, 0.91) | 0.68 (0.36, 1.27) | 0.17 | 0.93 (0.74, 1.17) |
| Free testosterone                               |               |                   |                   |      |                   |
| Tertile cutpoints                               | <3.9          | 3.9-6.6           | ≥6.6              |      |                   |
| Proximal colon (n = 289)                        |               |                   |                   |      |                   |
| Multivariable-adjusted OR (95% CI) <sup>c</sup> | 1 (reference) | 0.95 (0.63, 1.43) | 1.35 (0.89, 2.06) | 0.16 | 1.08 (0.93, 1.25) |
| Distal colon (n = 188)                          |               |                   |                   |      |                   |
| Multivariable-adjusted OR (95% CI) <sup>c</sup> | 1 (reference) | 1.11 (0.64, 1.93) | 1.17 (0.65, 2.11) | 0.61 | 0.93 (0.74, 1.17) |
| Estradiol to testosterone ratio                 |               |                   |                   |      |                   |
| Tertile cutpoints                               | <0.22         | 0.22-0.31         | ≥0.31             |      |                   |
| Proximal colon (n = 289)                        |               |                   |                   |      |                   |
| Multivariable-adjusted OR (95% CI) <sup>c</sup> | 1 (reference) | 1.25 (0.82, 1.91) | 1.23 (0.75, 2.02) | 0.40 | 1.99 (0.63, 6.32) |

Distal colon (n = 188)

|                                                 |               |                   |                   |      |                   |
|-------------------------------------------------|---------------|-------------------|-------------------|------|-------------------|
| Multivariable-adjusted OR (95% CI) <sup>c</sup> | 1 (reference) | 0.75 (0.45, 1.26) | 0.69 (0.37, 1.28) | 0.22 | 0.48 (0.07, 3.19) |
|-------------------------------------------------|---------------|-------------------|-------------------|------|-------------------|

---

<sup>a</sup> Statistical tests for trend (two-sided) were calculated using ordinal quartile variables entered into the model as a single continuous variable. OR = odds ratio; CI = confidence intervals; DHEA = dehydroepiandrosterone; SHBG = sex hormone-binding globulin.

<sup>b</sup> Serologic variables were log<sub>2</sub>-transformed in continuous models.

<sup>c</sup> ORs and 95% CIs were estimated by conditional logistic regression model. Adjusted for body mass index (continuous), smoking status (never, former, current or unknown), physical activity (inactive, moderately inactive, moderately active, active, or unknown), ever hormone use (yes, no or unknown/missing), alcohol consumption (continuous), and estrone, estradiol and testosterone were adjusted for SHBG and vice versa.

Supplementary Table 5. Association between circulating concentrations of sex hormones and SHBG with colon cancer by follow-up time in postmenopausal women (n=1120)

| Variables                                                          | Tertile 1     | Tertile 2         | Tertile 3         | $P_{\text{trend}}^{\text{a}}$ | Continuous model <sup>b</sup> | $P_{\text{interaction}}^{\text{c}}$ |
|--------------------------------------------------------------------|---------------|-------------------|-------------------|-------------------------------|-------------------------------|-------------------------------------|
| <b>Estrone</b>                                                     |               |                   |                   |                               |                               |                                     |
| Tertile cutpoints                                                  | <14.5         | 14.5-21.7         | $\geq 21.7$       |                               |                               |                                     |
| No. (cases/controls)                                               | 161/171       | 161/173           | 190/172           |                               |                               |                                     |
| Follow-up time                                                     |               |                   |                   |                               |                               | 0.17                                |
| <13.9 years, multivariable-adjusted OR (95% CI) <sup>d</sup>       | 1 (reference) | 0.97 (0.45, 2.12) | 0.63 (0.28, 1.43) | 0.24                          | 0.93 (0.62, 1.38)             |                                     |
| $\geq 13.9$ years, multivariable-adjusted OR (95% CI) <sup>d</sup> | 1 (reference) | 1.79 (0.78, 4.11) | 1.78 (0.68, 4.67) | 0.21                          | 1.16 (0.81, 1.67)             |                                     |
| <b>Estradiol</b>                                                   |               |                   |                   |                               |                               |                                     |
| Tertile cutpoints                                                  | <3.0          | 3.0-5.2           | $\geq 5.2$        |                               |                               |                                     |
| No. (cases/controls)                                               | 169/171       | 177/173           | 166/172           |                               |                               |                                     |
| Follow-up time                                                     |               |                   |                   |                               |                               | 0.80                                |
| <13.9 years, multivariable-adjusted OR (95% CI) <sup>d</sup>       | 1 (reference) | 0.79 (0.35, 1.80) | 0.67 (0.26, 1.76) | 0.42                          | 1.03 (0.76, 1.39)             |                                     |
| $\geq 13.9$ years, multivariable-adjusted OR (95% CI) <sup>d</sup> | 1 (reference) | 0.72 (0.34, 1.53) | 0.52 (0.19, 1.42) | 0.19                          | 0.96 (0.69, 1.33)             |                                     |
| <b>Testosterone</b>                                                |               |                   |                   |                               |                               |                                     |
| Tertile cutpoints                                                  | <149.5        | 149.5-221.1       | $\geq 221.1$      |                               |                               |                                     |
| No. (cases/controls)                                               | 170/171       | 147/172           | 195/173           |                               |                               |                                     |
| Follow-up time                                                     |               |                   |                   |                               |                               | 0.94                                |
| <13.9 years, multivariable-adjusted OR (95% CI) <sup>d</sup>       | 1 (reference) | 0.45 (0.21, 0.97) | 0.92 (0.40, 2.11) | 0.87                          | 0.97 (0.62, 1.51)             |                                     |
| $\geq 13.9$ years, multivariable-adjusted OR (95% CI) <sup>d</sup> | 1 (reference) | 0.56 (0.26, 1.22) | 0.99 (0.39, 2.49) | 0.83                          | 0.97 (0.60, 1.58)             |                                     |
| <b>Androstenedione</b>                                             |               |                   |                   |                               |                               |                                     |
| Tertile cutpoints                                                  | <394.7        | 394.7-589.2       | $\geq 589.2$      |                               |                               |                                     |
| No. (cases/controls)                                               | 165/171       | 166/171           | 181/173           |                               |                               |                                     |
| Follow-up time                                                     |               |                   |                   |                               |                               | 0.37                                |
| <13.9 years, multivariable-adjusted OR (95% CI) <sup>d</sup>       | 1 (reference) | 0.70 (0.34, 1.43) | 0.86 (0.42, 1.76) | 0.69                          | 0.77 (0.50, 1.20)             |                                     |
| $\geq 13.9$ years, multivariable-adjusted OR (95% CI) <sup>d</sup> | 1 (reference) | 1.65 (0.70, 3.90) | 1.02 (0.41, 2.57) | 0.87                          | 1.21 (0.74, 2.00)             |                                     |
| <b>DHEA</b>                                                        |               |                   |                   |                               |                               |                                     |
| Tertile cutpoints                                                  | <1414.3       | 1414.3-2482.3     | $\geq 2482.3$     |                               |                               |                                     |
| No. (cases/controls)                                               | 171/171       | 173/172           | 168/173           |                               |                               |                                     |
| Follow-up time                                                     |               |                   |                   |                               |                               | 0.07                                |

|                                                              |               |                   |                   |      |                   |      |
|--------------------------------------------------------------|---------------|-------------------|-------------------|------|-------------------|------|
| <13.9 years, multivariable-adjusted OR (95% CI) <sup>d</sup> | 1 (reference) | 0.58 (0.27, 1.24) | 0.81 (0.38, 1.74) | 0.57 | 0.74 (0.53, 1.02) |      |
| ≥13.9 years, multivariable-adjusted OR (95% CI) <sup>d</sup> | 1 (reference) | 1.10 (0.44, 2.72) | 2.02 (0.75, 5.39) | 0.18 | 1.19 (0.81, 1.76) |      |
| <b>Progesterone</b>                                          |               |                   |                   |      |                   |      |
| Tertile cutpoints                                            | <44.1         | 44.1-65.4         | ≥65.4             |      |                   |      |
| No. (cases/controls)                                         | 170/172       | 168/172           | 174/172           |      |                   |      |
| Follow-up time                                               |               |                   |                   |      |                   | 0.26 |
| <13.9 years, multivariable-adjusted OR (95% CI) <sup>d</sup> | 1 (reference) | 1.80 (0.79, 4.11) | 2.36 (1.16, 4.83) | 0.02 | 1.12 (0.75, 1.67) |      |
| ≥13.9 years, multivariable-adjusted OR (95% CI) <sup>d</sup> | 1 (reference) | 1.11 (0.46, 2.70) | 1.17 (0.49, 2.79) | 0.73 | 0.98 (0.60, 1.59) |      |
| <b>SHBG</b>                                                  |               |                   |                   |      |                   |      |
| Tertile cutpoints                                            | <46.0         | 46.0-63.7         | ≥63.7             |      |                   |      |
| No. (cases/controls)                                         | 195/172       | 131/172           | 186/172           |      |                   |      |
| Follow-up time                                               |               |                   |                   |      |                   | 0.35 |
| <13.9 years, multivariable-adjusted OR (95% CI) <sup>d</sup> | 1 (reference) | 0.80 (0.36, 1.77) | 1.02 (0.47, 2.21) | 0.93 | 1.04 (0.65, 1.66) |      |
| ≥13.9 years, multivariable-adjusted OR (95% CI) <sup>d</sup> | 1 (reference) | 0.16 (0.05, 0.50) | 0.55 (0.20, 1.49) | 0.37 | 0.82 (0.46, 1.47) |      |
| <b>Free estradiol</b>                                        |               |                   |                   |      |                   |      |
| Tertile cutpoints                                            | <69.5         | 69.5-123.4        | ≥123.4            |      |                   |      |
| No. (cases/controls)                                         | 185/171       | 152/172           | 175/173           |      |                   |      |
| Follow-up time                                               |               |                   |                   |      |                   | 0.71 |
| <13.9 years, multivariable-adjusted OR (95% CI) <sup>d</sup> | 1 (reference) | 0.42 (0.19, 0.92) | 0.57 (0.24, 1.38) | 0.33 | 0.99 (0.76, 1.30) |      |
| ≥13.9 years, multivariable-adjusted OR (95% CI) <sup>d</sup> | 1 (reference) | 0.95 (0.42, 2.13) | 0.89 (0.33, 2.37) | 0.81 | 0.97 (0.71, 1.33) |      |
| <b>Free testosterone</b>                                     |               |                   |                   |      |                   |      |
| Tertile cutpoints                                            | <3.9          | 3.9-6.6           | ≥6.6              |      |                   |      |
| No. (cases/controls)                                         | 157/171       | 161/172           | 194/173           |      |                   |      |
| Follow-up time                                               |               |                   |                   |      |                   | 0.76 |
| <13.9 years, multivariable-adjusted OR (95% CI) <sup>d</sup> | 1 (reference) | 0.59 (0.28, 1.26) | 0.98 (0.44, 2.16) | 0.96 | 0.99 (0.76, 1.30) |      |
| ≥13.9 years, multivariable-adjusted OR (95% CI) <sup>d</sup> | 1 (reference) | 1.11 (0.51, 2.44) | 1.30 (0.49, 3.42) | 0.60 | 0.97 (0.71, 1.33) |      |
| <b>Estradiol to testosterone ratio</b>                       |               |                   |                   |      |                   |      |
| Tertile cutpoints                                            | <0.22         | 0.22-0.31         | ≥0.31             |      |                   |      |
| No. (cases/controls)                                         | 168/171       | 175/172           | 169/173           |      |                   |      |
| Follow-up time                                               |               |                   |                   |      |                   | 0.96 |
| <13.9 years, multivariable-adjusted OR (95% CI) <sup>d</sup> | 1 (reference) | 0.81 (0.36, 1.82) | 0.70 (0.30, 1.65) | 0.42 | 0.79 (0.08, 8.12) |      |

≥13.9 years, multivariable-adjusted OR (95% CI)<sup>d</sup>      1 (reference)      0.85 (0.41, 1.77)      0.60 (0.21, 1.73)      0.37      1.02 (0.10, 10.74)

---

<sup>a</sup> Statistical tests for trend (two-sided) were calculated using ordinal quartile variables entered into the model as a single continuous variable. CI = confidence intervals; DHEA = dehydroepiandrosterone; OR = odds ratio; SHBG = sex hormone-binding globulin.

<sup>b</sup> Serologic variables were log<sub>2</sub>-transformed in continuous models.

<sup>c</sup> Heterogeneity by colon subsites were tested using  $\chi^2$  tests. The test was 2-sided.

<sup>d</sup> ORs and 95% CIs were estimated by conditional logistic regression models. Models were adjusted for body mass index (continuous), smoking status (never, former, current or unknown), physical activity (inactive, moderately inactive, moderately active, active, or unknown), ever hormone use (yes, no or unknown/missing), alcohol consumption (continuous), and estrone, estradiol and testosterone were adjusted for SHBG and vice versa.

Supplementary Table 6. Characteristics of studies included in the meta-analysis.

| Reference                  | Study design | Country of origin | Total no. of cases/controls | Method of sex hormone measurement                                       | Outcome | Categories (highest vs. lowest)            | OR (95%CI)                                               | Matched/Adjusted factors                                                                                                                                                          |
|----------------------------|--------------|-------------------|-----------------------------|-------------------------------------------------------------------------|---------|--------------------------------------------|----------------------------------------------------------|-----------------------------------------------------------------------------------------------------------------------------------------------------------------------------------|
| Lin, et al. 2013 (9)       | NCCS         | United States     | 293/437                     | Turbulent flow liquid chromatography tandem mass spectrometry           | CRC     | Estrone: Q1 vs. Q4<br>Estradiol: Q1 vs. Q4 | Estrone: 1.30 (0.74–2.26)<br>Estradiol: 1.12 (0.62–2.03) | Age at blood draw, fasting status, hour at blood draw, smoking, current alcohol intake, family history, physical activity, history of polyps, screening exam; BMI, and C-peptide. |
| Gunter, et al. 2008 (10)   | NCCS         | United States     | 438/809                     | Vitros-Eci Immunodiagnostic Assay                                       | CRC     | Estradiol: Q1 vs. Q2                       | Estradiol: 1.53 (1.02–2.27)                              | Age, smoking, ethnicity, family history of colorectal cancer, history of colonoscopy, physical activity, use of NSAIDs, and alcohol consumption.                                  |
| Clendenen, et al. 2009 (7) | NCCS         | United States     | 148/293                     | Radioimmunoassay following organic extraction and celite chromatography | CRC     | Estrone: Q1 vs. Q4<br>Estradiol: Q1 vs. Q3 | Estrone: 1.6 (0.8–3.0)<br>Estradiol: 0.8 (0.4–1.7)       | Matching factors and BMI.                                                                                                                                                         |
|                            |              |                   | 65/151                      |                                                                         | CC      | Estrone: Q1 vs. Q3                         | Estrone: 1.7 (0.9–3.1)                                   | Matching factors and BMI.                                                                                                                                                         |
|                            |              |                   | 81/142                      |                                                                         | RC      | Estrone: Q1 vs. Q3                         | Estrone: 2.0 (0.5–8.8)                                   | Matching factors and BMI.                                                                                                                                                         |
| Falk, et al. 2015 (8)      | NCCS         | United States     | 182/475                     | Stable isotope dilution liquid chromatography–tandem mass spectrometry  | CRC     | Estrone: Q1 vs. Q4<br>Estradiol: Q1 vs. Q4 | Estrone: 1.15 (0.69–1.93)<br>Estradiol: 0.98 (0.58–1.64) | BMI, parity, smoking, postmenopausal hormone use, and ages at menarche, birth of the first child, and menopause.                                                                  |
| Murphy, et al. 2015 (11)   | NCCS         | United States     | 401/802                     | Radioimmunoassay                                                        | CRC     | Estrone: Q1 vs. Q4<br>Estradiol: Q1 vs. Q4 | Estrone: 0.64 (0.43–0.97)<br>Estradiol: 0.50 (0.33–0.75) | Waist circumference, alcohol consumption, family history of colorectal cancer, physical activity, smoking status, and NSAID use.                                                  |
|                            |              |                   | 303/605                     |                                                                         | CC      | Estrone: Q1 vs. Q4<br>Estradiol: Q1 vs. Q4 | Estrone: 0.70 (0.46–1.07)<br>Estradiol: 0.90 (0.59–1.37) | Waist circumference, alcohol consumption, family history of colorectal cancer, physical activity, smoking status, and NSAID use                                                   |

|                           |      |       |         |                          |     |                         |                                |                                                                                                                                       |
|---------------------------|------|-------|---------|--------------------------|-----|-------------------------|--------------------------------|---------------------------------------------------------------------------------------------------------------------------------------|
|                           |      |       | 93/185  |                          | RC  | Estrone:<br>Q1 vs. Q3   | Estrone: 1.13<br>(0.49–2.62)   | Waist circumference, alcohol consumption,<br>family history of colorectal cancer, physical<br>activity, smoking status, and NSAID use |
|                           |      |       |         |                          |     | Estradiol:<br>Q1 vs. Q3 | Estradiol: 1.14<br>(0.63–3.28) |                                                                                                                                       |
| Mori, et al.<br>2019 (12) | NCCS | Japan | 185/361 | Electrochemiluminescence | CRC | Estradiol:<br>Q1 vs. Q3 | Estradiol: 2.28<br>(0.77–6.78) | BMI, smoking status, alcohol consumption,<br>and physical activity.                                                                   |

<sup>a</sup>NCCS = nested case-control study; CRC = colorectal cancer; CC = colon cancer; RC = rectal cancer; OR = odds ratio; CI = confidence interval; Q = quantile; NSAID = non-steroidal anti-inflammatory drugs BMI = body mass index
